# Supplementary material for: Visualization of Anatomic Variation of the Anterior Septal Vein on Susceptibility-Weighted Imaging
Source: PubMed Central journal article supplement (PMC5055311; doi:10.1371/journal.pone.0164221), 2016-10-07
Supplement: pone.0164221.s001.pdf [file pone.0164221.s001.pdf]

## Visualization of Anatomic Variation of the Anterior Septal Vein on Susceptibility-Weighted Imaging

S1 File. The SW and the T1-weighted images from one volunteer.

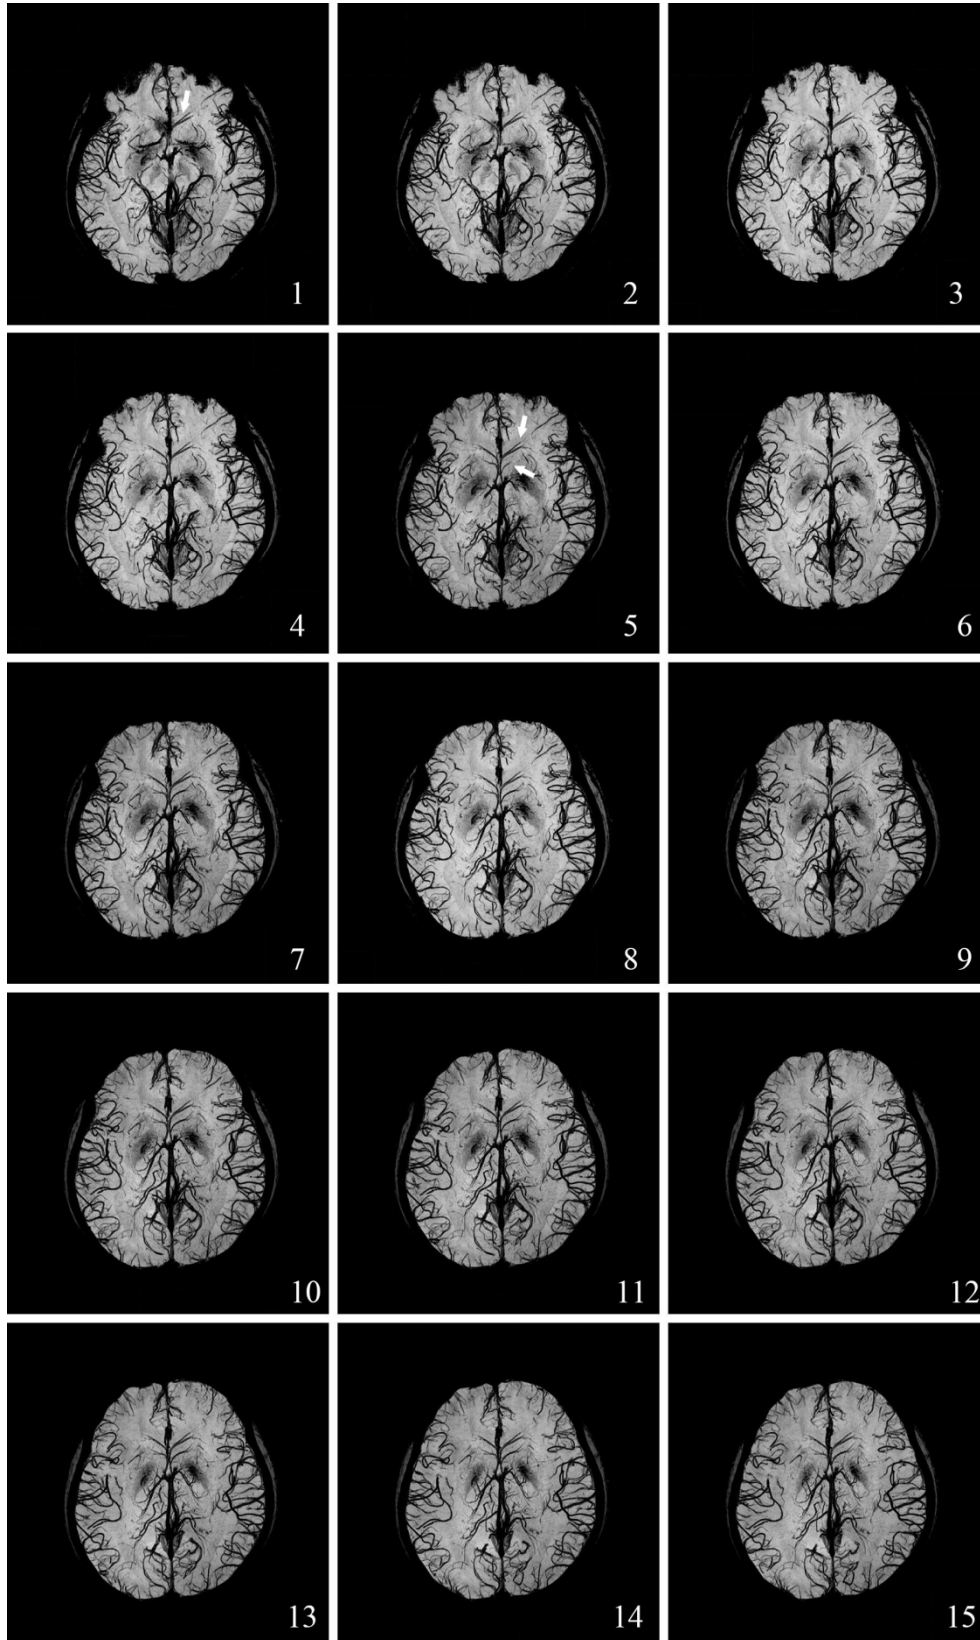

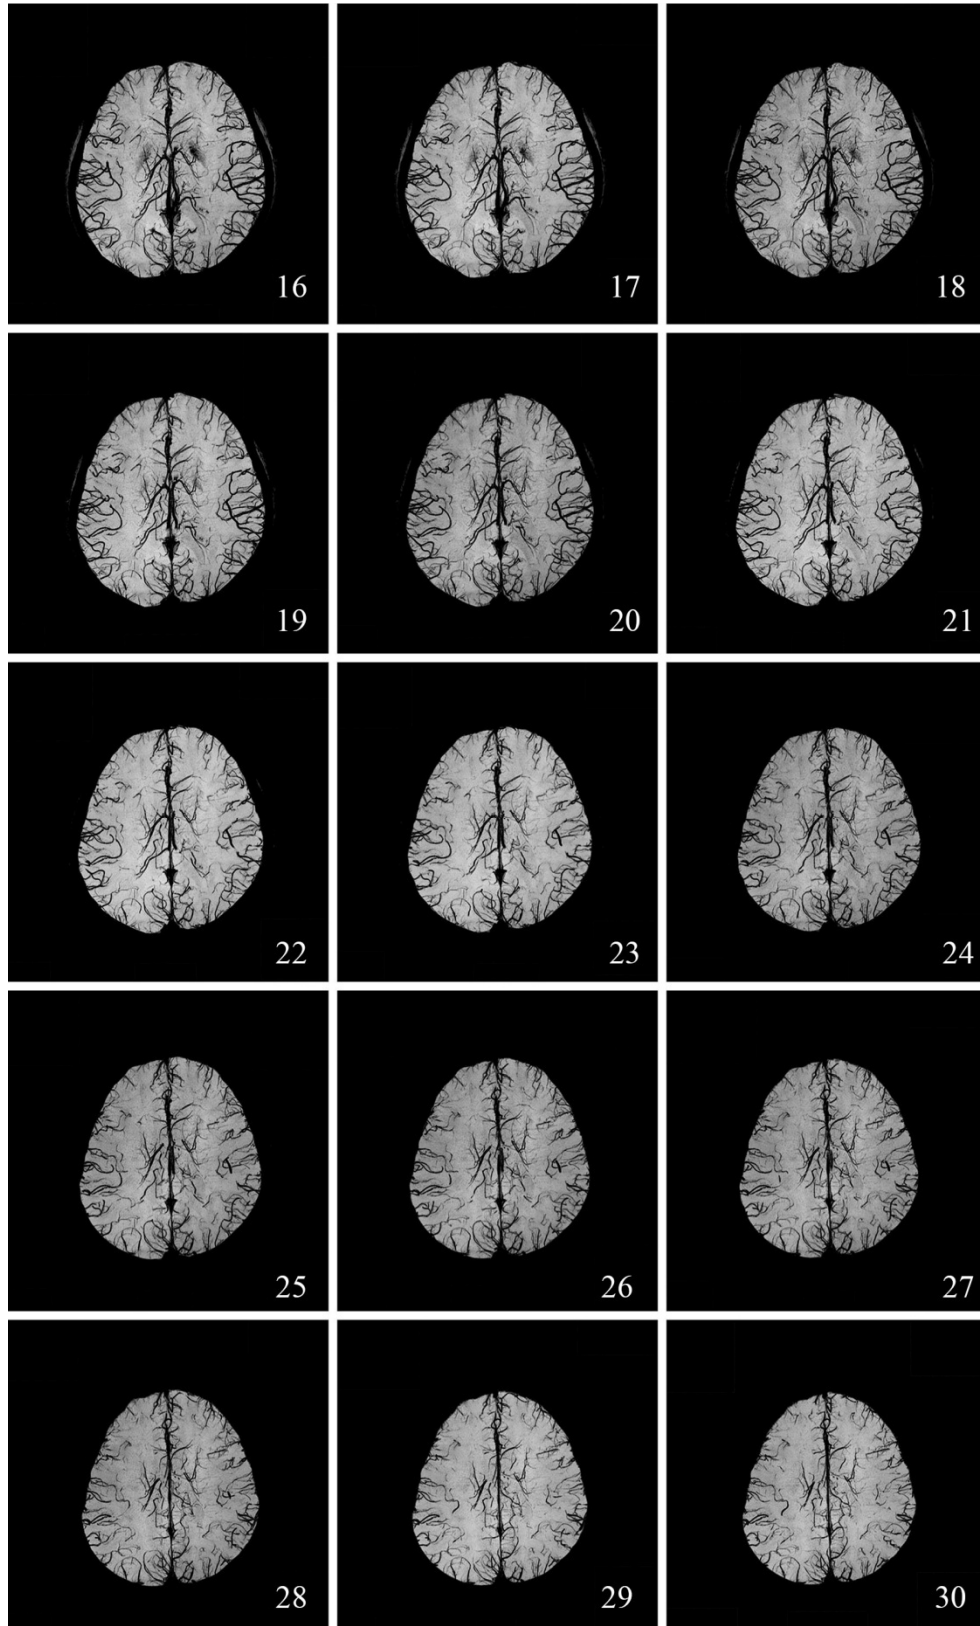

**Figure A. The SW images from one volunteer showing the anterior septal veins and their drainage. (white arrow, anterior septal vein).**

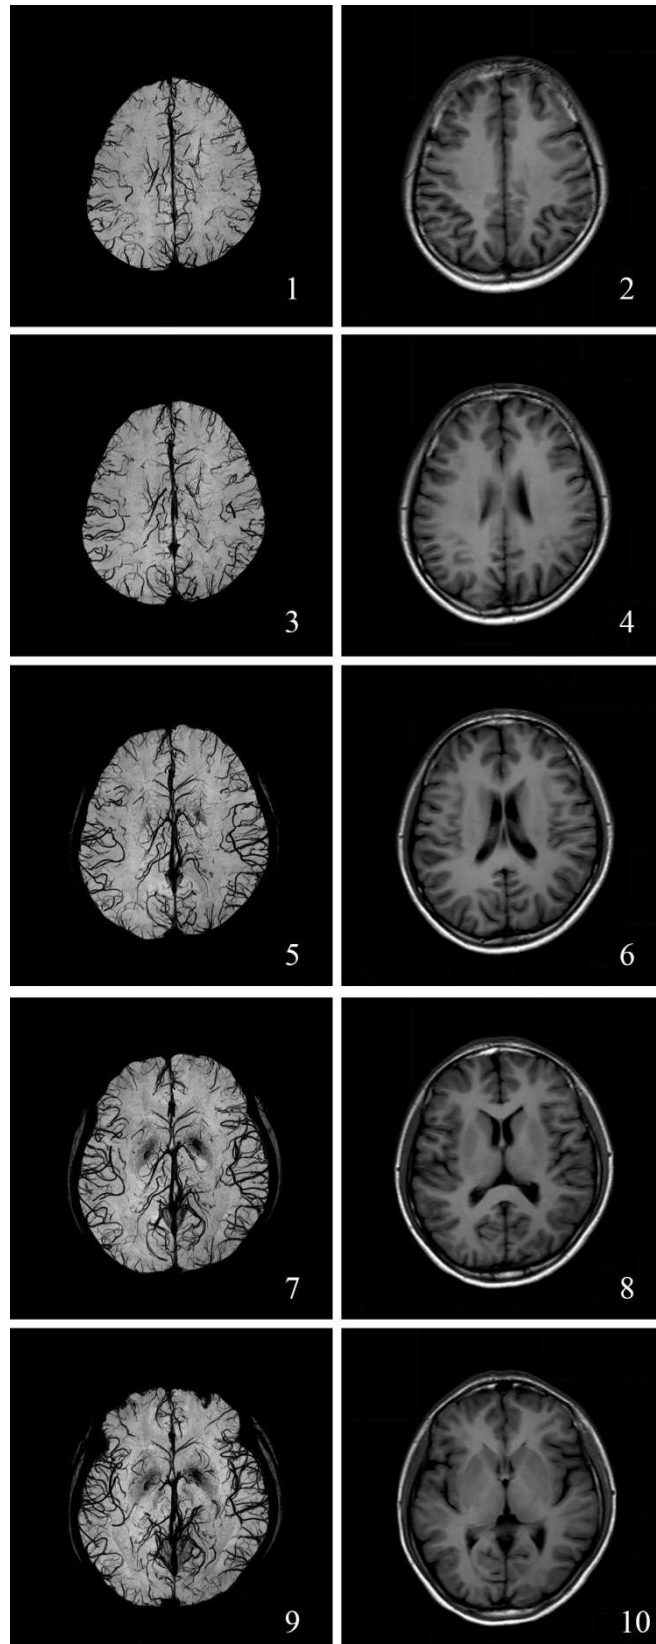

**Figure B. The SW and the corresponding T1-weighted images from one volunteer.**  
(1, 3, 5, 7, 9: SW image; 2, 4, 6, 8, 10: T1-weighted image).
